# Supplementary material
Source: PubMed Central journal article supplement (PMC6283282)
Supplement: NIHMS922203-supplement-3.pdf [file NIHMS922203-supplement-3.pdf]

**Supplementary Table S1: Spreadsheets containing lists of enriched mRNAs from respective tissue and neuronal cell types. Related to Figure 1.**

Sheet 1: transcripts at least 5 fold enriched in neuronal cells across replicates.

Sheet 2: transcripts at least 5 fold enriched in body wall muscle cells across replicates.

Sheet 3: transcripts at least 2 fold enriched in intestinal cells across replicates.

Sheet 4: transcripts at least 2 fold enriched in dopaminergic neurons across replicates, not enriched in serotonergic neurons.

Sheet 5: transcripts at least 2 fold enriched in serotonergic neurons across replicates, not enriched in dopaminergic neurons.

Sheet 6: all detected transcripts, neuronal cell TRAP experiments

Sheet 7: all detected transcripts, muscle cell TRAP experiments

Sheet 8: all detected transcripts, intestinal cell TRAP experiments

Sheet 9: all detected transcripts, dopaminergic cell TRAP experiments

Sheet 10: all detected transcripts, serotonergic cell TRAP experiments
